# Supplementary material
Source: PubMed Central journal article supplement (PMC7102599)
Supplement: mmc1.pdf [file mmc1.pdf]

**Cell, Volume 180**

**Supplemental Information**

**Structure, Function, and Antigenicity  
of the SARS-CoV-2 Spike Glycoprotein**

**Alexandra C. Walls, Young-Jun Park, M. Alejandra Tortorici, Abigail Wall, Andrew T. McGuire, and David Veesler**

**Supplementary Table 1. CryoEM data collection and refinement statistics. Related to Figure 3-5.**

|                                                     | SARS-CoV-2<br>S (closed)<br>PDB 6VXX<br>EMD-21452 | SARS-CoV-2 S<br>(one S <sup>B</sup> open)<br>PDB 6VYB<br>EMD-21457 |
|-----------------------------------------------------|---------------------------------------------------|--------------------------------------------------------------------|
| <b>Data collection and processing</b>               |                                                   |                                                                    |
| Magnification                                       | 130,000                                           | 130,000                                                            |
| Voltage (kV)                                        | 300                                               | 300                                                                |
| Electron exposure (e <sup>-</sup> /Å <sup>2</sup> ) | 70                                                | 70                                                                 |
| Defocus range (µm)                                  | 0.5-3.0                                           | 0.5-3.0                                                            |
| Pixel size (Å)                                      | 0.525                                             | 0.525                                                              |
| Symmetry imposed                                    | C3                                                | C1                                                                 |
| Final particle images (no.)                         | 172,966                                           | 197,005                                                            |
| Map resolution (Å)                                  | 3.1                                               | 3.3                                                                |
| FSC threshold                                       | 0.143                                             | 0.143                                                              |
| Map sharpening <i>B</i> factor (Å <sup>2</sup> )    | -74                                               | -59                                                                |
| <b>Validation</b>                                   |                                                   |                                                                    |
| MolProbity score                                    | 0.91                                              | 1.05                                                               |
| Clashscore                                          | 0.55                                              | 1.24                                                               |
| Poor rotamers (%)                                   | 0.23                                              | 0.04                                                               |
| Ramachandran plot                                   |                                                   |                                                                    |
| Favored (%)                                         | 96.55                                             | 96.7                                                               |
| Allowed (%)                                         | 99.58                                             | 99.43                                                              |
| Disallowed (%)                                      | 0.42                                              | 0.57                                                               |
| EMRinger Score                                      | 3.03                                              | 2.23                                                               |
